# Supplementary material for: Investigating the importance of sub-grid particle formation in point source plumes over eastern China using IAP-AACM v1.0 with a sub-grid parameterization
Source: Copernicus journal article supplement (doi:10.5194/gmd-14-4411-2021), 2021-07-16
Supplement: Supplementary file 1 [file gmd-14-4411-2021-supplement.pdf]

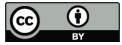

*Supplement of*

**Investigating the importance of sub-grid particle formation in point source plumes over eastern China using IAP-AACM v1.0 with a sub-grid parameterization**

**Ying Wei et al.**

*Correspondence to:* Xueshun Chen ([chenxsh@mail.iap.ac.cn](mailto:chenxsh@mail.iap.ac.cn))

The copyright of individual parts of the supplement might differ from the article licence.

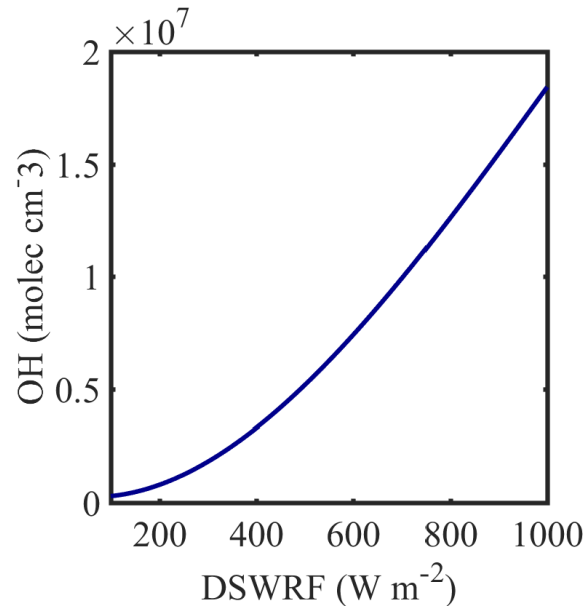

Fig. S1 The parameterization of the DSWRF-OH concentration curve in the SGPF scheme.

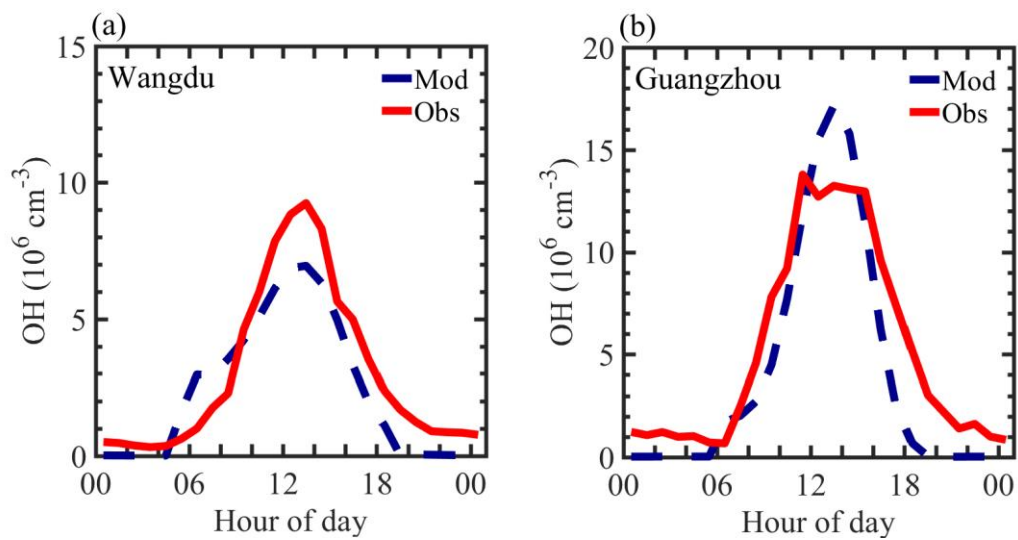

Fig. S2 Comparison of hourly median diurnal profiles (Beijing time) of OH concentration in summer. The observation at (a) Wangdu during 7 June-8 July 2014 and (b) Guangzhou during 3 July-30 July 2006 were collected from Tan et al. (2017) and Lu et al. (2012), respectively.

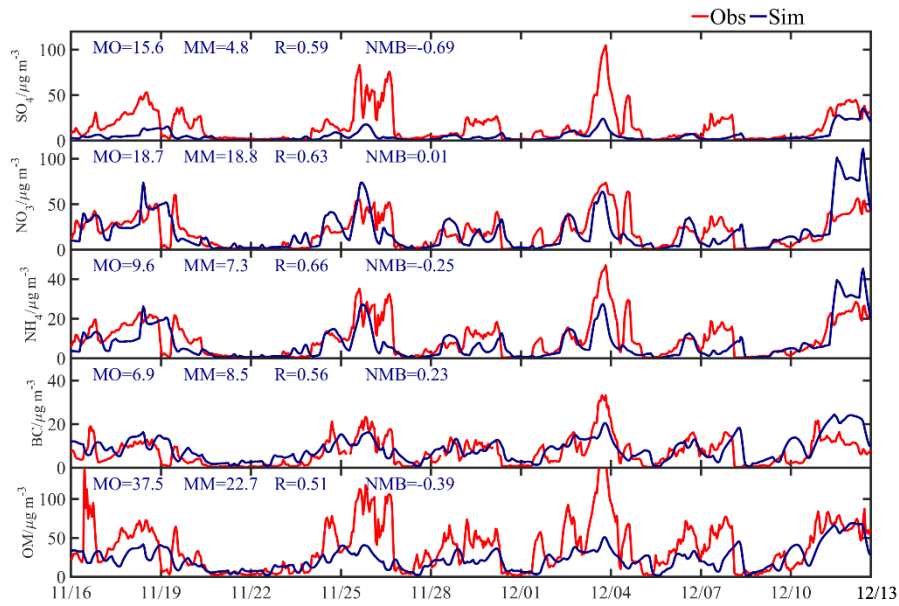

Fig. S3 Comparison of hourly simulated aerosol components against site observations during the APHH-Beijing in 2016. The blue and red line represent simulations with SG scheme and observations, respectively. Statistics of the normalized mean bias (NMB) and correlation coefficient (R) are also given on the subplots in blue texts.

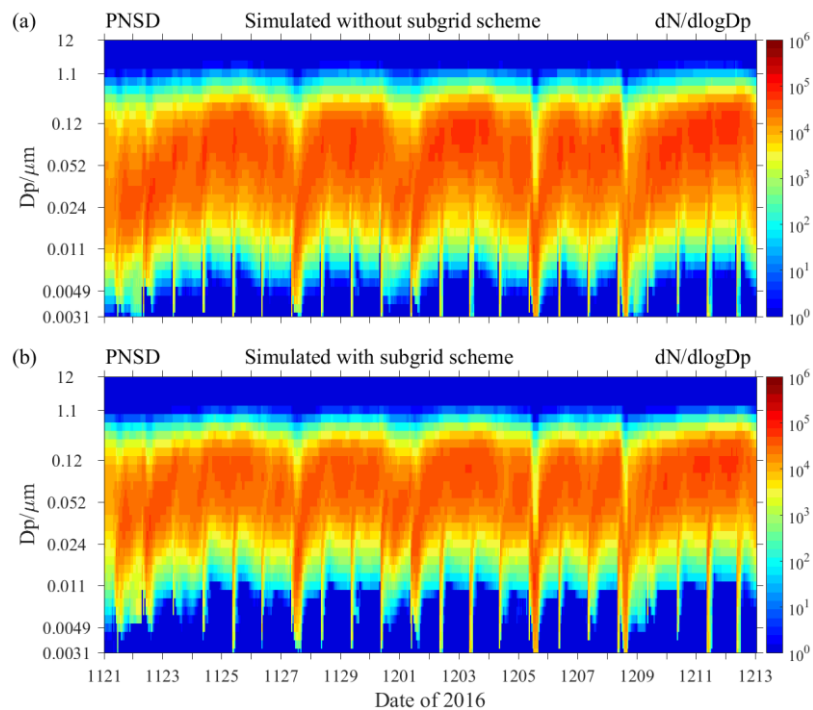

Fig. S4 Simulated particle number size distribution (3-1000 nm) of the IAP-AACM with (a) F2.5 and  $f_{new} = 5\%$  and (b) SG during the APHH-Beijing in 2016.
